# Supplementary material for: Systematic Identification of Multi Omics-based Biomarkers in KEAP1 Mutated TCGA Lung Adenocarcinoma
Source: PubMed Central journal article supplement (PMC6909944; doi:10.7150/jca.35489), 2019-11-01
Supplement: jcav10p6813s1.pdf [file jcav10p6813s1.pdf]

Supplementary figures

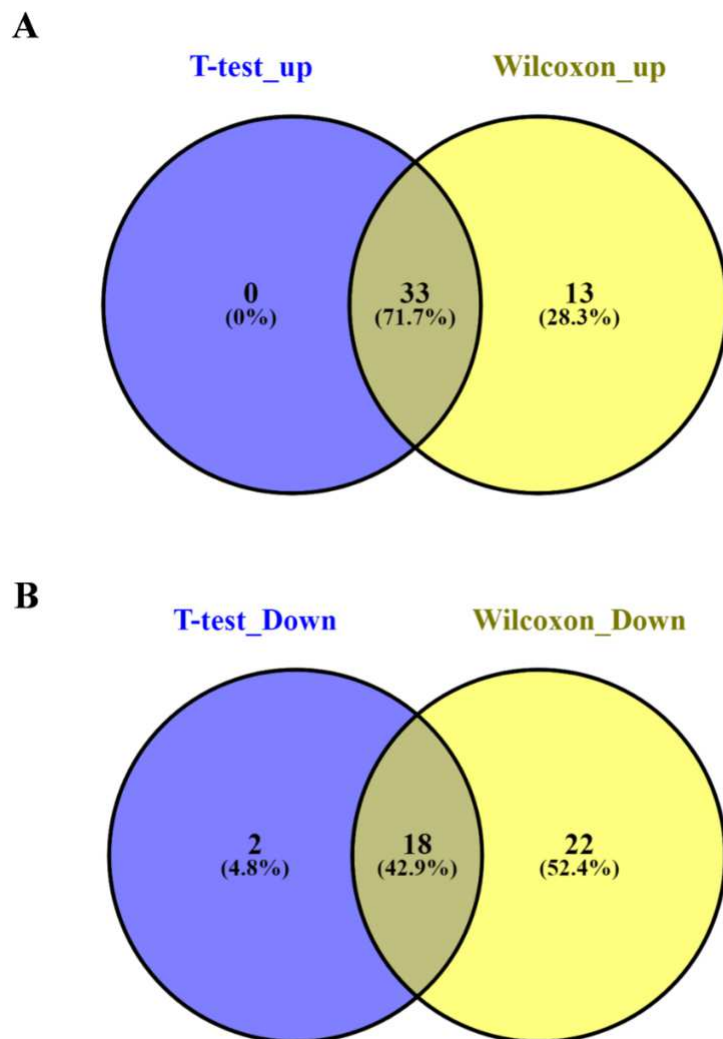

**Figure S1.** Integrated analysis of up (A) and down regulated (B) genes obtained from the KEAP1 mutation versus WT LUAD tumors.

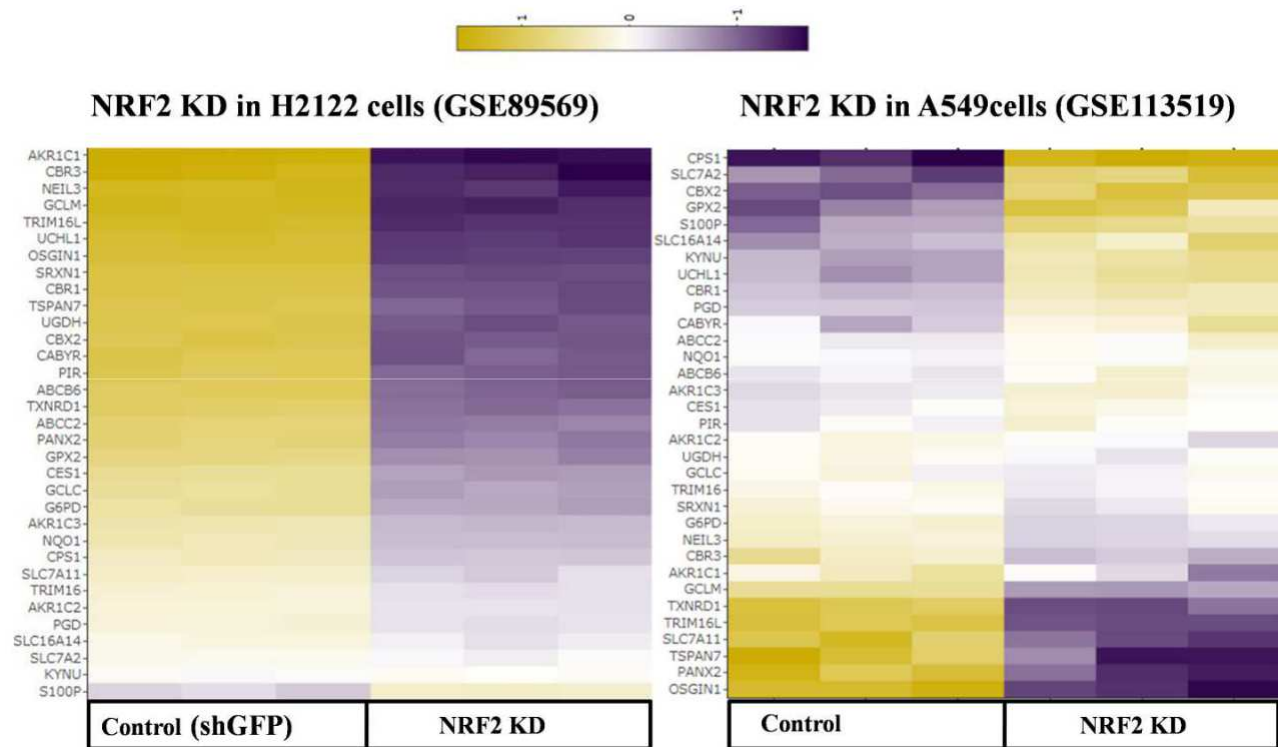

**Figure S2.** Patterns of KMSGC gene expression in RNA-Seq data of NRF2 knockdown lung adenocarcinoma cell lines such as H2122 from (A) Bar-Peled *et al*, 2017 (GSE89569) [16] and (B) A549 from Olganier *et al*, 2018 (GSE113519) [15].

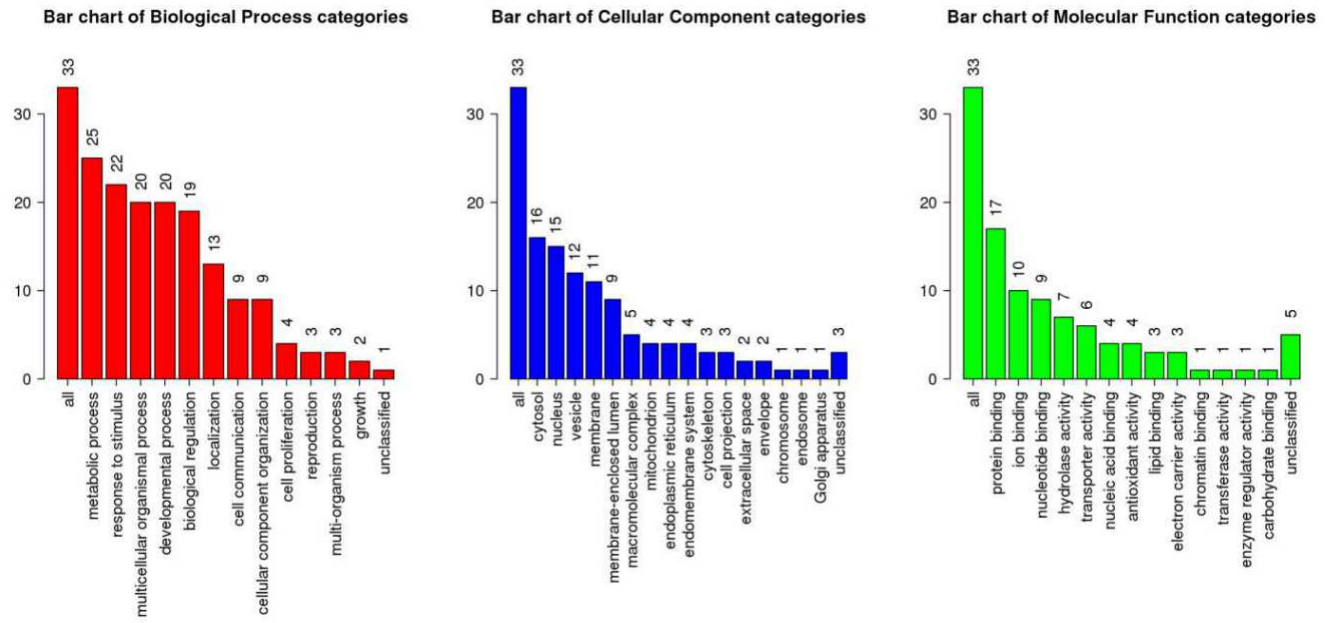

**Figure S3.** GO slim analysis of KMSGC by using WebGestalt

**Table S1: Stratification LUAD tumors based on KEAP1 mutations**

| <b>Patients barcode</b> | <b>KEAP1 mutation status</b> |
|-------------------------|------------------------------|
| TCGA.05.4244            | Wildtype                     |
| TCGA.05.4249            | Wildtype                     |
| TCGA.05.4250            | Wildtype                     |
| TCGA.05.4382            | Wildtype                     |
| TCGA.05.4384            | KEAP1 mutation               |
| TCGA.05.4389            | KEAP1 mutation               |
| TCGA.05.4390            | Wildtype                     |
| TCGA.05.4395            | KEAP1 mutation               |
| TCGA.05.4396            | Wildtype                     |
| TCGA.05.4397            | Wildtype                     |
| TCGA.05.4398            | Wildtype                     |
| TCGA.05.4402            | Wildtype                     |
| TCGA.05.4403            | Wildtype                     |
| TCGA.05.4405            | Wildtype                     |
| TCGA.05.4410            | Wildtype                     |
| TCGA.05.4415            | Wildtype                     |
| TCGA.05.4417            | Wildtype                     |
| TCGA.05.4418            | KEAP1 mutation               |
| TCGA.05.4420            | Wildtype                     |
| TCGA.05.4422            | Wildtype                     |
| TCGA.05.4424            | Wildtype                     |
| TCGA.05.4425            | Wildtype                     |
| TCGA.05.4426            | Wildtype                     |
| TCGA.05.4427            | Wildtype                     |
| TCGA.05.4430            | Wildtype                     |
| TCGA.05.4432            | Wildtype                     |
| TCGA.05.4433            | Wildtype                     |
| TCGA.05.4434            | Wildtype                     |
| TCGA.05.5420            | Wildtype                     |
| TCGA.05.5423            | Wildtype                     |
| TCGA.05.5425            | Wildtype                     |
| TCGA.05.5428            | Wildtype                     |
| TCGA.05.5429            | Wildtype                     |
| TCGA.05.5715            | Wildtype                     |
| TCGA.35.4122            | Wildtype                     |
| TCGA.35.4123            | Wildtype                     |
| TCGA.35.5375            | KEAP1 mutation               |

|              |                |
|--------------|----------------|
| TCGA.38.4625 | Wildtype       |
| TCGA.38.4626 | Wildtype       |
| TCGA.38.4627 | Wildtype       |
| TCGA.38.4628 | Wildtype       |
| TCGA.38.4629 | Wildtype       |
| TCGA.38.4630 | Wildtype       |
| TCGA.38.4631 | KEAP1 mutation |
| TCGA.38.4632 | Wildtype       |
| TCGA.38.6178 | Wildtype       |
| TCGA.38.7271 | Wildtype       |
| TCGA.38.A44F | Wildtype       |
| TCGA.44.2656 | Wildtype       |
| TCGA.44.2657 | Wildtype       |
| TCGA.44.2661 | Wildtype       |
| TCGA.44.2665 | Wildtype       |
| TCGA.44.3396 | Wildtype       |
| TCGA.44.3398 | Wildtype       |
| TCGA.44.3918 | Wildtype       |
| TCGA.44.3919 | Wildtype       |
| TCGA.44.4112 | Wildtype       |
| TCGA.44.5643 | Wildtype       |
| TCGA.44.5644 | Wildtype       |
| TCGA.44.5645 | Wildtype       |
| TCGA.44.6145 | Wildtype       |
| TCGA.44.6146 | Wildtype       |
| TCGA.44.6147 | Wildtype       |
| TCGA.44.6148 | Wildtype       |
| TCGA.44.6774 | Wildtype       |
| TCGA.44.6775 | Wildtype       |
| TCGA.44.6776 | KEAP1 mutation |
| TCGA.44.6777 | Wildtype       |
| TCGA.44.6778 | KEAP1 mutation |
| TCGA.44.6779 | KEAP1 mutation |
| TCGA.44.7659 | Wildtype       |
| TCGA.44.7660 | KEAP1 mutation |
| TCGA.44.7661 | Wildtype       |
| TCGA.44.7662 | Wildtype       |
| TCGA.44.7667 | KEAP1 mutation |
| TCGA.44.7669 | KEAP1 mutation |

|              |                |
|--------------|----------------|
| TCGA.44.7670 | Wildtype       |
| TCGA.44.7671 | KEAP1 mutation |
| TCGA.44.7672 | Wildtype       |
| TCGA.44.8117 | Wildtype       |
| TCGA.44.8119 | Wildtype       |
| TCGA.44.8120 | Wildtype       |
| TCGA.44.A479 | Wildtype       |
| TCGA.44.A47A | Wildtype       |
| TCGA.44.A47B | Wildtype       |
| TCGA.44.A47G | Wildtype       |
| TCGA.44.A4SS | KEAP1 mutation |
| TCGA.44.A4SU | Wildtype       |
| TCGA.49.4486 | KEAP1 mutation |
| TCGA.49.4487 | Wildtype       |
| TCGA.49.4488 | KEAP1 mutation |
| TCGA.49.4490 | Wildtype       |
| TCGA.49.4494 | Wildtype       |
| TCGA.49.4501 | Wildtype       |
| TCGA.49.4505 | Wildtype       |
| TCGA.49.4506 | KEAP1 mutation |
| TCGA.49.4507 | KEAP1 mutation |
| TCGA.49.4510 | Wildtype       |
| TCGA.49.4512 | Wildtype       |
| TCGA.49.4514 | KEAP1 mutation |
| TCGA.49.6742 | KEAP1 mutation |
| TCGA.49.6743 | KEAP1 mutation |
| TCGA.49.6744 | Wildtype       |
| TCGA.49.6745 | Wildtype       |
| TCGA.49.6761 | Wildtype       |
| TCGA.49.6767 | Wildtype       |
| TCGA.50.5044 | Wildtype       |
| TCGA.50.5045 | Wildtype       |
| TCGA.50.5049 | Wildtype       |
| TCGA.50.5051 | KEAP1 mutation |
| TCGA.50.5055 | Wildtype       |
| TCGA.50.5066 | Wildtype       |
| TCGA.50.5068 | KEAP1 mutation |
| TCGA.50.5072 | Wildtype       |
| TCGA.50.5930 | Wildtype       |

|              |                |
|--------------|----------------|
| TCGA.50.5931 | Wildtype       |
| TCGA.50.5932 | Wildtype       |
| TCGA.50.5933 | Wildtype       |
| TCGA.50.5935 | Wildtype       |
| TCGA.50.5936 | KEAP1 mutation |
| TCGA.50.5939 | KEAP1 mutation |
| TCGA.50.5941 | Wildtype       |
| TCGA.50.5942 | Wildtype       |
| TCGA.50.5944 | Wildtype       |
| TCGA.50.5946 | Wildtype       |
| TCGA.50.6590 | Wildtype       |
| TCGA.50.6591 | Wildtype       |
| TCGA.50.6592 | Wildtype       |
| TCGA.50.6593 | Wildtype       |
| TCGA.50.6594 | Wildtype       |
| TCGA.50.6595 | Wildtype       |
| TCGA.50.6597 | Wildtype       |
| TCGA.50.6673 | Wildtype       |
| TCGA.50.7109 | Wildtype       |
| TCGA.50.8457 | Wildtype       |
| TCGA.50.8459 | Wildtype       |
| TCGA.50.8460 | Wildtype       |
| TCGA.53.7624 | KEAP1 mutation |
| TCGA.53.7626 | Wildtype       |
| TCGA.53.7813 | Wildtype       |
| TCGA.53.A4EZ | KEAP1 mutation |
| TCGA.55.1592 | Wildtype       |
| TCGA.55.1595 | Wildtype       |
| TCGA.55.5899 | KEAP1 mutation |
| TCGA.55.6543 | Wildtype       |
| TCGA.55.6642 | Wildtype       |
| TCGA.55.6712 | Wildtype       |
| TCGA.55.6968 | Wildtype       |
| TCGA.55.6969 | Wildtype       |
| TCGA.55.6970 | KEAP1 mutation |
| TCGA.55.6971 | Wildtype       |
| TCGA.55.6972 | KEAP1 mutation |
| TCGA.55.6975 | Wildtype       |
| TCGA.55.6978 | Wildtype       |

|              |                |
|--------------|----------------|
| TCGA.55.6979 | Wildtype       |
| TCGA.55.6980 | Wildtype       |
| TCGA.55.6981 | Wildtype       |
| TCGA.55.6982 | Wildtype       |
| TCGA.55.6983 | Wildtype       |
| TCGA.55.6984 | Wildtype       |
| TCGA.55.6985 | Wildtype       |
| TCGA.55.6986 | Wildtype       |
| TCGA.55.6987 | KEAP1 mutation |
| TCGA.55.7227 | Wildtype       |
| TCGA.55.7281 | Wildtype       |
| TCGA.55.7283 | Wildtype       |
| TCGA.55.7284 | Wildtype       |
| TCGA.55.7570 | Wildtype       |
| TCGA.55.7573 | Wildtype       |
| TCGA.55.7574 | Wildtype       |
| TCGA.55.7576 | Wildtype       |
| TCGA.55.7724 | Wildtype       |
| TCGA.55.7725 | Wildtype       |
| TCGA.55.7726 | Wildtype       |
| TCGA.55.7727 | Wildtype       |
| TCGA.55.7728 | Wildtype       |
| TCGA.55.7815 | KEAP1 mutation |
| TCGA.55.7816 | Wildtype       |
| TCGA.55.7903 | Wildtype       |
| TCGA.55.7907 | Wildtype       |
| TCGA.55.7910 | Wildtype       |
| TCGA.55.7911 | Wildtype       |
| TCGA.55.7913 | Wildtype       |
| TCGA.55.7914 | Wildtype       |
| TCGA.55.7994 | Wildtype       |
| TCGA.55.7995 | KEAP1 mutation |
| TCGA.55.8085 | KEAP1 mutation |
| TCGA.55.8087 | Wildtype       |
| TCGA.55.8089 | Wildtype       |
| TCGA.55.8090 | Wildtype       |
| TCGA.55.8091 | Wildtype       |
| TCGA.55.8092 | Wildtype       |
| TCGA.55.8094 | KEAP1 mutation |



|              |                |
|--------------|----------------|
| TCGA.55.8096 | Wildtype       |
| TCGA.55.8097 | Wildtype       |
| TCGA.55.8203 | Wildtype       |
| TCGA.55.8204 | Wildtype       |
| TCGA.55.8205 | Wildtype       |
| TCGA.55.8206 | Wildtype       |
| TCGA.55.8207 | Wildtype       |
| TCGA.55.8208 | Wildtype       |
| TCGA.55.8299 | Wildtype       |
| TCGA.55.8301 | Wildtype       |
| TCGA.55.8302 | KEAP1 mutation |
| TCGA.55.8505 | KEAP1 mutation |
| TCGA.55.8506 | KEAP1 mutation |
| TCGA.55.8507 | Wildtype       |
| TCGA.55.8508 | Wildtype       |
| TCGA.55.8510 | KEAP1 mutation |
| TCGA.55.8511 | Wildtype       |
| TCGA.55.8512 | Wildtype       |
| TCGA.55.8513 | Wildtype       |
| TCGA.55.8514 | Wildtype       |
| TCGA.55.8614 | Wildtype       |
| TCGA.55.8615 | Wildtype       |
| TCGA.55.8616 | Wildtype       |
| TCGA.55.8619 | Wildtype       |
| TCGA.55.8620 | KEAP1 mutation |
| TCGA.55.8621 | Wildtype       |
| TCGA.55.A48X | Wildtype       |
| TCGA.55.A48Y | Wildtype       |
| TCGA.55.A48Z | Wildtype       |
| TCGA.55.A490 | Wildtype       |
| TCGA.55.A491 | Wildtype       |
| TCGA.55.A492 | KEAP1 mutation |
| TCGA.55.A493 | Wildtype       |
| TCGA.55.A494 | Wildtype       |
| TCGA.55.A4DF | KEAP1 mutation |
| TCGA.55.A4DG | Wildtype       |
| TCGA.62.8394 | Wildtype       |
| TCGA.62.8395 | Wildtype       |
| TCGA.62.8397 | Wildtype       |

|              |                |
|--------------|----------------|
| TCGA.62.8398 | KEAP1 mutation |
| TCGA.62.8399 | Wildtype       |
| TCGA.62.8402 | Wildtype       |
| TCGA.62.A46O | KEAP1 mutation |
| TCGA.62.A46P | Wildtype       |
| TCGA.62.A46R | Wildtype       |
| TCGA.62.A46S | Wildtype       |
| TCGA.62.A46U | Wildtype       |
| TCGA.62.A46V | Wildtype       |
| TCGA.62.A46Y | Wildtype       |
| TCGA.62.A470 | KEAP1 mutation |
| TCGA.62.A471 | Wildtype       |
| TCGA.62.A472 | Wildtype       |
| TCGA.64.1676 | Wildtype       |
| TCGA.64.1677 | Wildtype       |
| TCGA.64.1679 | Wildtype       |
| TCGA.64.1681 | Wildtype       |
| TCGA.64.5774 | Wildtype       |
| TCGA.64.5775 | Wildtype       |
| TCGA.64.5778 | Wildtype       |
| TCGA.64.5779 | Wildtype       |
| TCGA.64.5781 | KEAP1 mutation |
| TCGA.64.5815 | Wildtype       |
| TCGA.67.3771 | KEAP1 mutation |
| TCGA.67.3772 | Wildtype       |
| TCGA.67.3773 | Wildtype       |
| TCGA.67.4679 | Wildtype       |
| TCGA.67.6215 | Wildtype       |
| TCGA.67.6216 | Wildtype       |
| TCGA.67.6217 | Wildtype       |
| TCGA.69.7760 | Wildtype       |
| TCGA.69.7761 | Wildtype       |
| TCGA.69.7763 | Wildtype       |
| TCGA.69.7764 | Wildtype       |
| TCGA.69.7765 | Wildtype       |
| TCGA.69.7973 | Wildtype       |
| TCGA.69.7974 | Wildtype       |
| TCGA.69.7978 | Wildtype       |
| TCGA.69.7979 | Wildtype       |

|              |                |
|--------------|----------------|
| TCGA.69.7980 | Wildtype       |
| TCGA.69.8253 | KEAP1 mutation |
| TCGA.69.8254 | Wildtype       |
| TCGA.69.8255 | Wildtype       |
| TCGA.69.A59K | Wildtype       |
| TCGA.71.6725 | Wildtype       |
| TCGA.71.8520 | Wildtype       |
| TCGA.73.4658 | Wildtype       |
| TCGA.73.4659 | Wildtype       |
| TCGA.73.4662 | Wildtype       |
| TCGA.73.4666 | KEAP1 mutation |
| TCGA.73.4668 | Wildtype       |
| TCGA.73.4670 | KEAP1 mutation |
| TCGA.73.4675 | Wildtype       |
| TCGA.73.4676 | KEAP1 mutation |
| TCGA.73.4677 | KEAP1 mutation |
| TCGA.73.7498 | KEAP1 mutation |
| TCGA.73.7499 | Wildtype       |
| TCGA.75.5122 | Wildtype       |
| TCGA.75.5125 | Wildtype       |
| TCGA.75.5126 | Wildtype       |
| TCGA.75.5146 | Wildtype       |
| TCGA.75.5147 | Wildtype       |
| TCGA.75.6203 | Wildtype       |
| TCGA.75.6205 | Wildtype       |
| TCGA.75.6206 | KEAP1 mutation |
| TCGA.75.6207 | Wildtype       |
| TCGA.75.6211 | KEAP1 mutation |
| TCGA.75.6212 | Wildtype       |
| TCGA.75.6214 | Wildtype       |
| TCGA.75.7025 | Wildtype       |
| TCGA.75.7027 | KEAP1 mutation |
| TCGA.75.7030 | Wildtype       |
| TCGA.75.7031 | Wildtype       |
| TCGA.78.7143 | Wildtype       |
| TCGA.78.7145 | Wildtype       |
| TCGA.78.7146 | KEAP1 mutation |
| TCGA.78.7147 | Wildtype       |
| TCGA.78.7148 | Wildtype       |

|              |                |
|--------------|----------------|
| TCGA.78.7149 | KEAP1 mutation |
| TCGA.78.7150 | Wildtype       |
| TCGA.78.7152 | Wildtype       |
| TCGA.78.7153 | KEAP1 mutation |
| TCGA.78.7154 | KEAP1 mutation |
| TCGA.78.7155 | Wildtype       |
| TCGA.78.7156 | KEAP1 mutation |
| TCGA.78.7158 | KEAP1 mutation |
| TCGA.78.7159 | Wildtype       |
| TCGA.78.7160 | Wildtype       |
| TCGA.78.7161 | Wildtype       |
| TCGA.78.7162 | KEAP1 mutation |
| TCGA.78.7163 | Wildtype       |
| TCGA.78.7166 | KEAP1 mutation |
| TCGA.78.7167 | KEAP1 mutation |
| TCGA.78.7220 | Wildtype       |
| TCGA.78.7535 | Wildtype       |
| TCGA.78.7536 | Wildtype       |
| TCGA.78.7537 | Wildtype       |
| TCGA.78.7539 | Wildtype       |
| TCGA.78.7540 | Wildtype       |
| TCGA.78.7542 | Wildtype       |
| TCGA.78.7633 | KEAP1 mutation |
| TCGA.78.8640 | Wildtype       |
| TCGA.78.8648 | Wildtype       |
| TCGA.78.8655 | Wildtype       |
| TCGA.78.8660 | Wildtype       |
| TCGA.78.8662 | Wildtype       |
| TCGA.80.5607 | Wildtype       |
| TCGA.80.5608 | Wildtype       |
| TCGA.80.5611 | Wildtype       |
| TCGA.83.5908 | Wildtype       |
| TCGA.86.6562 | Wildtype       |
| TCGA.86.6851 | Wildtype       |
| TCGA.86.7701 | Wildtype       |
| TCGA.86.7711 | Wildtype       |
| TCGA.86.7713 | Wildtype       |
| TCGA.86.7714 | Wildtype       |
| TCGA.86.7953 | Wildtype       |

|              |                |
|--------------|----------------|
| TCGA.86.7954 | Wildtype       |
| TCGA.86.7955 | Wildtype       |
| TCGA.86.8054 | Wildtype       |
| TCGA.86.8055 | Wildtype       |
| TCGA.86.8056 | Wildtype       |
| TCGA.86.8073 | Wildtype       |
| TCGA.86.8074 | Wildtype       |
| TCGA.86.8075 | Wildtype       |
| TCGA.86.8076 | Wildtype       |
| TCGA.86.8278 | Wildtype       |
| TCGA.86.8279 | Wildtype       |
| TCGA.86.8280 | Wildtype       |
| TCGA.86.8281 | KEAP1 mutation |
| TCGA.86.8358 | KEAP1 mutation |
| TCGA.86.8359 | Wildtype       |
| TCGA.86.8585 | Wildtype       |
| TCGA.86.8668 | Wildtype       |
| TCGA.86.8669 | Wildtype       |
| TCGA.86.8671 | Wildtype       |
| TCGA.86.8672 | Wildtype       |
| TCGA.86.8673 | Wildtype       |
| TCGA.86.8674 | KEAP1 mutation |
| TCGA.86.A456 | Wildtype       |
| TCGA.86.A4JF | Wildtype       |
| TCGA.86.A4P7 | Wildtype       |
| TCGA.86.A4P8 | Wildtype       |
| TCGA.91.6828 | Wildtype       |
| TCGA.91.6829 | Wildtype       |
| TCGA.91.6830 | Wildtype       |
| TCGA.91.6831 | Wildtype       |
| TCGA.91.6835 | Wildtype       |
| TCGA.91.6836 | Wildtype       |
| TCGA.91.6840 | Wildtype       |
| TCGA.91.6847 | Wildtype       |
| TCGA.91.6848 | KEAP1 mutation |
| TCGA.91.6849 | KEAP1 mutation |
| TCGA.91.7771 | Wildtype       |
| TCGA.91.8496 | Wildtype       |
| TCGA.91.8497 | Wildtype       |

|              |                |
|--------------|----------------|
| TCGA.91.8499 | Wildtype       |
| TCGA.91.A4BC | Wildtype       |
| TCGA.91.A4BD | Wildtype       |
| TCGA.93.7347 | Wildtype       |
| TCGA.93.7348 | Wildtype       |
| TCGA.93.8067 | Wildtype       |
| TCGA.93.A4JN | Wildtype       |
| TCGA.93.A4JO | Wildtype       |
| TCGA.93.A4JP | Wildtype       |
| TCGA.93.A4JQ | Wildtype       |
| TCGA.95.7039 | Wildtype       |
| TCGA.95.7043 | KEAP1 mutation |
| TCGA.95.7562 | Wildtype       |
| TCGA.95.7567 | Wildtype       |
| TCGA.95.7944 | Wildtype       |
| TCGA.95.7947 | KEAP1 mutation |
| TCGA.95.7948 | Wildtype       |
| TCGA.95.8039 | Wildtype       |
| TCGA.95.8494 | Wildtype       |
| TCGA.95.A4VK | Wildtype       |
| TCGA.95.A4VN | Wildtype       |
| TCGA.95.A4VP | Wildtype       |
| TCGA.97.7546 | Wildtype       |
| TCGA.97.7547 | Wildtype       |
| TCGA.97.7552 | Wildtype       |
| TCGA.97.7553 | Wildtype       |
| TCGA.97.7554 | Wildtype       |
| TCGA.97.7937 | Wildtype       |
| TCGA.97.7938 | Wildtype       |
| TCGA.97.7941 | Wildtype       |
| TCGA.97.8171 | Wildtype       |
| TCGA.97.8172 | Wildtype       |
| TCGA.97.8174 | Wildtype       |
| TCGA.97.8175 | Wildtype       |
| TCGA.97.8176 | KEAP1 mutation |
| TCGA.97.8177 | Wildtype       |
| TCGA.97.8179 | KEAP1 mutation |
| TCGA.97.8547 | Wildtype       |
| TCGA.97.8552 | Wildtype       |

|              |                |
|--------------|----------------|
| TCGA.97.A4LX | Wildtype       |
| TCGA.97.A4M0 | Wildtype       |
| TCGA.97.A4M1 | Wildtype       |
| TCGA.97.A4M2 | Wildtype       |
| TCGA.97.A4M3 | KEAP1 mutation |
| TCGA.97.A4M5 | Wildtype       |
| TCGA.97.A4M6 | Wildtype       |
| TCGA.97.A4M7 | Wildtype       |
| TCGA.99.7458 | Wildtype       |
| TCGA.99.8025 | Wildtype       |
| TCGA.99.8028 | Wildtype       |
| TCGA.99.8032 | Wildtype       |
| TCGA.99.8033 | KEAP1 mutation |
| TCGA.J2.8192 | Wildtype       |
| TCGA.J2.8194 | KEAP1 mutation |
| TCGA.J2.A4AD | Wildtype       |
| TCGA.J2.A4AE | Wildtype       |
| TCGA.J2.A4AG | Wildtype       |
| TCGA.L4.A4E5 | Wildtype       |
| TCGA.L4.A4E6 | Wildtype       |
| TCGA.L9.A443 | Wildtype       |
| TCGA.L9.A444 | Wildtype       |
| TCGA.MN.A4N1 | Wildtype       |
| TCGA.MN.A4N4 | Wildtype       |
| TCGA.MN.A4N5 | Wildtype       |
| TCGA.MP.A4SV | Wildtype       |
| TCGA.MP.A4SW | Wildtype       |
| TCGA.MP.A4SY | Wildtype       |
| TCGA.MP.A4T4 | Wildtype       |
| TCGA.MP.A4T6 | Wildtype       |
| TCGA.MP.A4T7 | KEAP1 mutation |
| TCGA.MP.A4T8 | Wildtype       |
| TCGA.MP.A4T9 | Wildtype       |
| TCGA.MP.A4TA | Wildtype       |
| TCGA.MP.A4TC | Wildtype       |
| TCGA.MP.A4TD | Wildtype       |
| TCGA.MP.A4TE | KEAP1 mutation |
| TCGA.MP.A4TF | Wildtype       |
| TCGA.MP.A4TH | Wildtype       |

|              |                |
|--------------|----------------|
| TCGA.MP.A4TI | Wildtype       |
| TCGA.MP.A4TK | Wildtype       |
| TCGA.MP.A5C7 | KEAP1 mutation |
| TCGA.NJ.A4YF | Wildtype       |
| TCGA.NJ.A4YG | Wildtype       |
| TCGA.NJ.A4YI | Wildtype       |
| TCGA.NJ.A4YP | Wildtype       |
| TCGA.NJ.A4YQ | KEAP1 mutation |
| TCGA.NJ.A55A | Wildtype       |
| TCGA.NJ.A55O | Wildtype       |
| TCGA.NJ.A55R | KEAP1 mutation |
| TCGA.O1.A52J | Wildtype       |



**Table S2: List of up and down regulated overlapping genes obtained from the DEG analysis of KEAP1 mutated *versus* WT TCGA LUAD tumors**

| Up regulated genes |             |          |               |             |             | Overlapping genes-33 |
|--------------------|-------------|----------|---------------|-------------|-------------|----------------------|
| T-test             |             |          | Wilcoxon test |             |             |                      |
| Gene name          | Fold Change | P-value  | Gene name     | Fold Change | P-value     |                      |
| AKR1C2             | 6.22577199  | 6.22E-36 | AKR1C2        | 7.973287    | 4.38E-31    | AKR1C2               |
| AKR1C1             | 5.27539217  | 1.12E-31 | GPX2          | 6.594421    | 4.59E-25    | AKR1C1               |
| GPX2               | 5.18901554  | 9.72E-29 | AKR1C1        | 6.14441     | 2.27E-30    | GPX2                 |
| ABCC2              | 3.46148392  | 6.19E-13 | ABCC2         | 4.711354    | 1.84E-14    | ABCC2                |
| AKR1C3             | 3.43028499  | 4.10E-31 | UCHL1         | 4.013097    | 1.60E-20    | AKR1C3               |
| CABYR              | 3.02191006  | 1.47E-26 | AKR1C3        | 3.829775    | 1.54E-29    | CABYR                |
| UCHL1              | 2.98582679  | 6.73E-20 | CABYR         | 3.128283    | 6.94E-27    | UCHL1                |
| TRIM16L            | 2.88041915  | 4.17E-35 | TRIM16L       | 3.120047    | 2.63E-34    | TRIM16L              |
| S100P              | 2.84567569  | 2.83E-12 | CPS1          | 3.08974     | 6.43E-05    | S100P                |
| CPS1               | 2.60283699  | 7.50E-06 | S100P         | 3.03509     | 4.07E-14    | CPS1                 |
| SLC7A11            | 2.5799527   | 2.30E-29 | SLC7A11       | 2.938262    | 5.92E-25    | SLC7A11              |
| NQO1               | 2.51708219  | 4.13E-33 | NQO1          | 2.87386     | 7.96E-30    | NQO1                 |
| SRXN1              | 2.3574174   | 1.37E-32 | SRXN1         | 2.691927    | 3.90E-32    | SRXN1                |
| OSGIN1             | 2.34650288  | 4.32E-24 | OSGIN1        | 2.648101    | 4.76E-28    | OSGIN1               |
| TXNRD1             | 2.15744664  | 1.91E-30 | TXNRD1        | 2.568179    | 1.14E-28    | TXNRD1               |
| GCLC               | 2.02594655  | 3.91E-19 | SLC7A2        | 2.497097    | 4.09E-08    | GCLC                 |
| CES1               | 2.01479231  | 2.03E-08 | KYNU          | 2.479675    | 3.01E-10    | CES1                 |
| PANX2              | 2.00428378  | 8.95E-30 | G6PD          | 2.396941    | 7.64E-26    | PANX2                |
| G6PD               | 1.93433109  | 1.46E-22 | TSPAN7        | 2.375416    | 3.73E-15    | G6PD                 |
| TSPAN7             | 1.92053673  | 6.55E-13 | SLC16A14      | 2.210635    | 6.62E-11    | TSPAN7               |
| CBR1               | 1.91808199  | 3.49E-13 | GCLC          | 2.198029    | 1.20E-22    | CBR1                 |
| CBX2               | 1.86309965  | 3.43E-22 | PANX2         | 2.162661    | 4.84E-26    | CBX2                 |
| KYNU               | 1.81552807  | 6.07E-09 | CES1          | 2.071875    | 1.67E-09    | KYNU                 |
| PIR                | 1.80576355  | 3.19E-31 | SMOC1         | 2.052403    | 0.029573514 | PIR                  |
| NEIL3              | 1.75752271  | 8.75E-16 | PIR           | 2.04217     | 6.36E-28    | NEIL3                |
| UGDH               | 1.73315733  | 8.45E-23 | CBX2          | 2.011997    | 5.33E-23    | UGDH                 |
| PGD                | 1.72352446  | 1.83E-31 | UGDH          | 2.005381    | 1.60E-24    | PGD                  |
| CBR3               | 1.7144523   | 1.30E-12 | MAP2          | 2.00048     | 4.24E-13    | CBR3                 |
| SLC7A2             | 1.66490371  | 3.08E-07 | TRIM16        | 1.928616    | 3.17E-28    | SLC7A2               |
| TRIM16             | 1.66402986  | 3.76E-28 | ABP1          | 1.892875    | 0.012664322 | TRIM16               |
| ABCB6              | 1.56239919  | 5.58E-24 | CARD14        | 1.831906    | 5.69E-11    | ABCB6                |
| GCLM               | 1.55687797  | 2.33E-24 | CBR1          | 1.825556    | 3.36E-18    | GCLM                 |
| SLC16A14           | 1.51836805  | 2.25E-09 | PGD           | 1.810587    | 4.61E-33    | SLC16A14             |
|                    |             |          | NEIL3         | 1.775105    | 1.57E-16    |                      |
|                    |             |          | GSR           | 1.768656    | 1.88E-27    |                      |
|                    |             |          | ABCB6         | 1.765827    | 1.88E-27    |                      |

|         |          |            |
|---------|----------|------------|
| RASD1   | 1.746061 | 3.72E-08   |
| BTBD11  | 1.654456 | 1.02E-10   |
| GCLM    | 1.653446 | 1.21E-26   |
| CA12    | 1.636828 | 0.00062899 |
| CBR3    | 1.571071 | 6.73E-16   |
| PTGR1   | 1.542664 | 8.21E-22   |
| SDCBP2  | 1.539571 | 4.67E-08   |
| SLC16A4 | 1.528676 | 1.58E-05   |
| CMBL    | 1.526846 | 2.05E-13   |
| PDE4D   | 1.503486 | 1.44E-06   |

### Down regulated genes

| T-test    |             |          | Wilcoxon test |             |             | Overlapping genes-18 |
|-----------|-------------|----------|---------------|-------------|-------------|----------------------|
| Gene name | Fold Change | P-value  | Gene name     | Fold Change | P-value     |                      |
| SLC1A7    | -2.83848361 | 1.12E-26 | MFSD4         | -2.81405    | 3.62268E-15 | SLC1A7               |
| MFSD4     | -2.07753994 | 7.49E-16 | SPTB          | -2.45716    | 3.21694E-07 | MFSD4                |
| TFPI2     | -2.05201566 | 6.05E-08 | ITGB8         | -2.43343    | 2.9137E-12  | TFPI2                |
| SYT12     | -2.04680282 | 7.47E-11 | VSIG1         | -2.41088    | 1.96069E-09 | SYT12                |
| VSIG1     | -2.02727732 | 1.96E-10 | SLC1A7        | -2.30125    | 1.85683E-16 | VSIG1                |
| DNAH11    | -1.9951635  | 1.17E-11 | DNAH11        | -2.25243    | 4.04801E-12 | DNAH11               |
| LRRN4     | -1.96372587 | 7.54E-11 | TFPI2         | -2.14113    | 1.76192E-08 | LRRN4                |
| ITGB8     | -1.91106113 | 3.66E-11 | CDH3          | -2.12914    | 1.32474E-11 | ITGB8                |
| SLC34A2   | -1.89286364 | 2.69E-09 | RASGRF1       | -2.11221    | 2.26878E-10 | SLC34A2              |
| CDH3      | -1.86592525 | 2.25E-09 | CX3CL1        | -2.09048    | 4.07063E-18 | CDH3                 |
| TNC       | -1.81785732 | 1.51E-12 | PNMAL1        | -2.00915    | 6.30043E-07 | TNC                  |
| HLA-DQB2  | -1.75300661 | 1.10E-12 | SLC34A2       | -1.96616    | 4.6371E-12  | HLA-DQB2             |
| PIGR      | -1.69879051 | 8.91E-07 | DPP4          | -1.94342    | 1.20195E-08 | PIGR                 |
| ADORA1    | -1.68597835 | 1.30E-12 | LRRN4         | -1.8957     | 2.71948E-11 | ADORA1               |
| RASGRF1   | -1.67357752 | 4.18E-11 | TNC           | -1.85354    | 9.18543E-14 | RASGRF1              |
| CX3CL1    | -1.66778141 | 5.83E-19 | PIGR          | -1.8277     | 1.73535E-07 | CX3CL1               |
| FCGBP     | -1.60231062 | 4.52E-11 | SYT12         | -1.80663    | 3.74867E-10 | FCGBP                |
| HOXD1     | -1.58549362 | 1.79E-09 | RYR1          | -1.80004    | 1.46321E-07 | HOXD1                |
| PLAT      | -1.50994419 | 2.08E-21 | WDR66         | -1.79436    | 1.82765E-10 |                      |
| ISM1      | -1.50443224 | 1.35E-14 | HOXD1         | -1.78407    | 3.04136E-09 |                      |
|           |             |          | NMNAT2        | -1.76644    | 2.64268E-06 |                      |
|           |             |          | PHYHD1        | -1.76614    | 6.67837E-08 |                      |
|           |             |          | EFS           | -1.71796    | 3.88067E-11 |                      |
|           |             |          | MT1E          | -1.69422    | 1.2784E-09  |                      |
|           |             |          | STAC          | -1.68343    | 8.12307E-09 |                      |
|           |             |          | TDRD10        | -1.68115    | 1.43524E-05 |                      |
|           |             |          | ARHGAP20      | -1.66822    | 7.6091E-13  |                      |

|          |          |             |
|----------|----------|-------------|
| ADORA1   | -1.65107 | 5.5017E-14  |
| EYA2     | -1.62576 | 6.62599E-06 |
| SLC16A9  | -1.62531 | 9.41522E-06 |
| FCGBP    | -1.6187  | 3.58409E-10 |
| ROS1     | -1.59788 | 9.29278E-09 |
| ACHE     | -1.59169 | 1.77681E-07 |
| APLP1    | -1.58662 | 2.23898E-05 |
| VSTM2L   | -1.58221 | 3.30746E-07 |
| HLA-DQB2 | -1.55569 | 1.11452E-12 |
| KCNJ15   | -1.53328 | 4.84457E-09 |
| SEMA3A   | -1.52598 | 1.70285E-07 |
| CRABP2   | -1.51135 | 9.76477E-06 |
| ESPN     | -1.50643 | 1.41822E-05 |

**Table S4: Prediction of NRF2 binding sites of KMSGC by using the *in silico* analysis and NRF2-A549 cells ENCODE and Olagnier *et al*, 2018 (GSE113519) ChIP-Seq datas.**

| <i>in silico</i> analysis results |           |           |                                        |                 |           |
|-----------------------------------|-----------|-----------|----------------------------------------|-----------------|-----------|
| Chr                               | Start     | End       | Annotation                             | Distance to TSS | Gene Name |
| chr2                              | 220082669 | 220082680 | intron (NM_005689, intron 1 of 18)     | 1064            | ABCB6     |
| chr10                             | 101539728 | 101539739 | Intergenic                             | -2621           | ABCC2     |
| chr10                             | 101535777 | 101535788 | Intergenic                             | -6572           | ABCC2     |
| chr10                             | 101524554 | 101524565 | Intergenic                             | -17795          | ABCC2     |
| chr10                             | 101543924 | 101543935 | intron (NM_000392, intron 1 of 31)     | 1575            | ABCC2     |
| chr10                             | 4995798   | 4995809   | Intergenic                             | -9650           | AKR1C1    |
| chr10                             | 4999262   | 4999273   | Intergenic                             | -6186           | AKR1C1    |
| chr10                             | 5054973   | 5054984   | intron (NM_001354, intron 1 of 10)     | 5246            | AKR1C2    |
| chr10                             | 5114098   | 5114109   | intron (NM_001253908, intron 1 of 8)   | -22464          | AKR1C3    |
| chr10                             | 5138029   | 5138040   | intron (NM_003739, intron 1 of 8)      | 1467            | AKR1C3    |
| chr18                             | 21772352  | 21772363  | intron (NM_018030, intron 4 of 13)     | 52910           | CABYR     |
| chr18                             | 21753406  | 21753417  | intron (NM_018030, intron 7 of 13)     | 33964           | CABYR     |
| chr18                             | 21727932  | 21727943  | intron (NM_138644, intron 3 of 5)      | 8490            | CABYR     |
| chr18                             | 21712935  | 21712946  | 3' UTR (NM_001135993, exon 14 of 14)   | -5979           | CABYR     |
| chr18                             | 21766008  | 21766019  | intron (NM_018030, intron 4 of 13)     | 46566           | CABYR     |
| chr18                             | 21773824  | 21773835  | intron (NM_018030, intron 4 of 13)     | 54382           | CABYR     |
| chr17                             | 77743996  | 77744007  | Intergenic                             | -7975           | CBX2      |
| chr16                             | 55852121  | 55852132  | intron (NM_001025195, intron 7 of 13)  | 14948           | CES1      |
| chr16                             | 55870438  | 55870449  | Intergenic                             | -3369           | CES1      |
| chr16                             | 55839857  | 55839868  | intron (NM_001025195, intron 12 of 13) | 27212           | CES1      |
| chr16                             | 55868163  | 55868174  | Intergenic                             | -1094           | CES1      |
| chr6                              | 53413045  | 53413056  | Intergenic                             | -3124           | GCLC      |
| chr6                              | 53316051  | 53316062  | Intergenic                             | 93870           | GCLC      |

|       |           |           |                                       |         |          |
|-------|-----------|-----------|---------------------------------------|---------|----------|
| chr6  | 53383078  | 53383089  | intron (NM_001498, intron 3 of 15)    | 26843   | GCLC     |
| chr1  | 94470740  | 94470751  | intron (NM_000350, intron 44 of 49)   | -95592  | GCLM     |
| chr1  | 94430206  | 94430217  | Intergenic                            | -55058  | GCLM     |
| chr1  | 94390951  | 94390962  | Intergenic                            | -15803  | GCLM     |
| chr14 | 65421101  | 65421112  | intron (NM_198686, intron 1 of 6)     | -11484  | GPX2     |
| chr2  | 143348755 | 143348766 | Intergenic                            | -286434 | KYNU     |
| chr2  | 143732013 | 143732024 | intron (NM_001032998, intron 8 of 11) | 96824   | KYNU     |
| chr2  | 143545067 | 143545078 | Intergenic                            | -90122  | KYNU     |
| chr2  | 143591012 | 143591023 | Intergenic                            | -44177  | KYNU     |
| chr2  | 143518234 | 143518245 | Intergenic                            | -116955 | KYNU     |
| chr2  | 143442928 | 143442939 | Intergenic                            | -192261 | KYNU     |
| chr2  | 143276473 | 143276484 | Intergenic                            | -358716 | KYNU     |
| chr2  | 143560938 | 143560949 | Intergenic                            | -74251  | KYNU     |
| chr2  | 143680029 | 143680040 | intron (NM_001032998, intron 3 of 11) | 44840   | KYNU     |
| chr2  | 143734293 | 143734304 | intron (NM_001032998, intron 8 of 11) | 99104   | KYNU     |
| chr4  | 178219158 | 178219169 | Intergenic                            | -11827  | NEIL3    |
| chr4  | 178128918 | 178128929 | Intergenic                            | -102067 | NEIL3    |
| chr4  | 178296772 | 178296783 | Intergenic                            | 65787   | NEIL3    |
| chr4  | 178293902 | 178293913 | Intergenic                            | 62917   | NEIL3    |
| chr4  | 178071979 | 178071990 | Intergenic                            | -159006 | NEIL3    |
| chr4  | 178128313 | 178128324 | Intergenic                            | -102672 | NEIL3    |
| chr16 | 69760908  | 69760919  | promoter-TSS (NM_001286137)           | -343    | NQO1     |
| chr16 | 69768969  | 69768980  | Intergenic                            | -8404   | NQO1     |
| chr16 | 83976952  | 83976963  | Intergenic                            | -9869   | OSGIN1   |
| chr1  | 10440740  | 10440751  | 3' UTR (NM_015074, exon 47 of 47)     | -18303  | PGD      |
| chrX  | 15514662  | 15514673  | Intergenic                            | -2957   | PIR      |
| chr2  | 230964071 | 230964082 | Intergenic                            | -30362  | SLC16A14 |
| chr2  | 230934484 | 230934495 | promoter-TSS (NM_152527)              | -775    | SLC16A14 |
| chr2  | 230984820 | 230984831 | Intergenic                            | -51111  | SLC16A14 |
| chr2  | 230861341 | 230861352 | intron (NM_174899, intron 2 of 3)     | 72368   | SLC16A14 |

|       |           |           |                                       |         |          |
|-------|-----------|-----------|---------------------------------------|---------|----------|
| chr2  | 230974017 | 230974028 | Intergenic                            | -40308  | SLC16A14 |
| chr2  | 230973814 | 230973825 | Intergenic                            | -40105  | SLC16A14 |
| chr2  | 230983545 | 230983556 | Intergenic                            | -49836  | SLC16A14 |
| chr4  | 139173880 | 139173891 | Intergenic                            | -10383  | SLC7A11  |
| chr4  | 139115227 | 139115238 | intron (NM_014331, intron 6 of 11)    | 48270   | SLC7A11  |
| chr4  | 139156848 | 139156859 | intron (NM_014331, intron 2 of 11)    | 6649    | SLC7A11  |
| chr8  | 17318002  | 17318013  | Intergenic                            | -36589  | SLC7A2   |
| chr8  | 17357190  | 17357201  | intron (NM_001008539, intron 1 of 11) | 2599    | SLC7A2   |
| chr20 | 641249    | 641260    | TTS (NM_033129)                       | -7241   | SRXN1    |
| chr17 | 18633473  | 18633484  | intron (NM_001353225, intron 2 of 3)  | 8143    | TRIM16L  |
| chrX  | 38529382  | 38529393  | intron (NM_004615, intron 2 of 7)     | 108657  | TSPAN7   |
| chrX  | 38525780  | 38525791  | intron (NM_004615, intron 2 of 7)     | 105055  | TSPAN7   |
| chrX  | 38376403  | 38376414  | Intergenic                            | -44322  | TSPAN7   |
| chrX  | 38423767  | 38423778  | intron (NM_004615, intron 1 of 7)     | 3042    | TSPAN7   |
| chrX  | 38353468  | 38353479  | Intergenic                            | -67257  | TSPAN7   |
| chrX  | 38492848  | 38492859  | intron (NM_004615, intron 1 of 7)     | 72123   | TSPAN7   |
| chrX  | 38319262  | 38319273  | Intergenic                            | -101463 | TSPAN7   |
| chrX  | 38512599  | 38512610  | intron (NM_004615, intron 1 of 7)     | 91874   | TSPAN7   |
| chrX  | 38379982  | 38379993  | Intergenic                            | -40743  | TSPAN7   |
| chr12 | 104613290 | 104613301 | intron (NM_001093771, intron 1 of 16) | 3739    | TXNRD1   |
| chr12 | 104667784 | 104667795 | intron (NM_001093771, intron 3 of 16) | -12670  | TXNRD1   |
| chr12 | 104674045 | 104674056 | intron (NM_001093771, intron 3 of 16) | -6409   | TXNRD1   |
| chr4  | 41259458  | 41259469  | promoter-TSS (NR_102709)              | 566     | UCHL1    |
| chr4  | 39516837  | 39516848  | intron (NM_001184701, intron 1 of 10) | 12375   | UGDH     |

**ENCODE-NRF2-A549 ChIP-Seq results**

| <b>Chr</b> | <b>Start</b> | <b>End</b> | <b>Annotation</b>                  | <b>Distance to TSS</b> | <b>Gene Name</b> |
|------------|--------------|------------|------------------------------------|------------------------|------------------|
| chr2       | 220082581    | 220082774  | intron (NM_005689, intron 1 of 18) | 1061                   | ABCB6            |
| chr10      | 101544969    | 101545111  | intron (NM_000392, intron 2 of 31) | 2685                   | ABCC2            |

|       |           |           |                                      |        |        |
|-------|-----------|-----------|--------------------------------------|--------|--------|
| chr10 | 101520086 | 101520356 | Intergenic                           | -22134 | ABCC2  |
| chr10 | 101535727 | 101535906 | Intergenic                           | -6538  | ABCC2  |
| chr10 | 101594148 | 101594418 | exon (NM_000392, exon 24 of 32)      | 51928  | ABCC2  |
| chr10 | 4995662   | 4995932   | Intergenic                           | -9657  | AKR1C1 |
| chr10 | 4983820   | 4984003   | Intergenic                           | -21542 | AKR1C1 |
| chr10 | 4989958   | 4990228   | Intergenic                           | -15361 | AKR1C1 |
| chr10 | 5062507   | 5062690   | Intergenic                           | -2374  | AKR1C2 |
| chr10 | 5051568   | 5051669   | intron (NM_001354, intron 1 of 10)   | -5413  | AKR1C2 |
| chr10 | 5075630   | 5075819   | Intergenic                           | -15233 | AKR1C3 |
| chr10 | 5137902   | 5138172   | intron (NM_003739, intron 1 of 8)    | 1469   | AKR1C3 |
| chr10 | 5113969   | 5114237   | intron (NM_001253908, intron 1 of 8) | -22465 | AKR1C3 |
| chr10 | 5121057   | 5121327   | intron (NM_001253908, intron 1 of 8) | -15376 | AKR1C3 |
| chr18 | 21754086  | 21754356  | intron (NM_018030, intron 7 of 13)   | 34773  | CABYR  |
| chr18 | 21717118  | 21717388  | Intergenic                           | -1667  | CABYR  |
| chr21 | 37442018  | 37442288  | promoter-TSS (NM_001757)             | -69    | CBR1   |
| chr17 | 77743865  | 77744135  | Intergenic                           | -7977  | CBX2   |
| chr17 | 77738642  | 77738912  | Intergenic                           | -13200 | CBX2   |
| chr16 | 55870288  | 55870558  | Intergenic                           | -3348  | CES1   |
| chr6  | 53412985  | 53413121  | Intergenic                           | -3126  | GCLC   |
| chr1  | 94374911  | 94375147  | 5' UTR (NM_002061, exon 1 of 7)      | 125    | GCLM   |
| chr1  | 94429335  | 94429424  | Intergenic                           | -54226 | GCLM   |
| chr14 | 65409431  | 65409701  | promoter-TSS (NM_002083)             | 57     | GPX2   |
| chr2  | 143630978 | 143631187 | Intergenic                           | -4112  | KYNU   |
| chr2  | 143632017 | 143632287 | Intergenic                           | -3043  | KYNU   |
| chr4  | 178229533 | 178229613 | Intergenic                           | -1418  | NEIL3  |
| chr16 | 69760750  | 69761049  | promoter-TSS (NM_001286137)          | -329   | NQO1   |
| chr16 | 83986669  | 83986804  | promoter-TSS (NM_182981)             | -90    | OSGIN1 |
| chr22 | 50608460  | 50608730  | promoter-TSS (NR_027691)             | -565   | PANX2  |
| chr1  | 10448166  | 10448350  | Intergenic                           | -10791 | PGD    |
| chr1  | 10447672  | 10447942  | Intergenic                           | -11242 | PGD    |

|       |           |           |                                       |        |         |
|-------|-----------|-----------|---------------------------------------|--------|---------|
| chrX  | 15511347  | 15511489  | 5' UTR (NM_003662, exon 1 of 10)      | 293    | PIR     |
| chr4  | 139163559 | 139163670 | promoter-TSS (NM_014331)              | -112   | SLC7A11 |
| chr4  | 139173736 | 139174006 | Intergenic                            | -10368 | SLC7A11 |
| chr4  | 139156747 | 139156944 | intron (NM_014331, intron 2 of 11)    | 6657   | SLC7A11 |
| chr20 | 633997    | 634297    | promoter-TSS (NM_080725)              | -133   | SRXN1   |
| chrX  | 38429702  | 38429972  | intron (NM_004615, intron 1 of 7)     | 9106   | TSPAN7  |
| chr12 | 104613165 | 104613452 | intron (NM_001093771, intron 1 of 16) | 3752   | TXNRD1  |
| chr12 | 104682531 | 104682641 | intron (NM_001261445, intron 1 of 14) | 2126   | TXNRD1  |
| chr12 | 104680586 | 104680849 | 5' UTR (NM_001261445, exon 1 of 15)   | 258    | TXNRD1  |
| chr12 | 104671170 | 104671440 | intron (NM_001093771, intron 3 of 16) | -9155  | TXNRD1  |
| chr12 | 104680129 | 104680399 | promoter-TSS (NM_001261445)           | -196   | TXNRD1  |
| chr4  | 41259304  | 41259574  | promoter-TSS (NR_102709)              | 541    | UCHL1   |
| chr4  | 39516751  | 39517052  | intron (NM_001184701, intron 1 of 10) | 12316  | UGDH    |

| Olagner et al, 2018 ChIP-Seq results |             |             |               |          |           |
|--------------------------------------|-------------|-------------|---------------|----------|-----------|
| Chr                                  | Start       | End         | Dist to Start | Position | Gene List |
| 10                                   | 101,535,606 | 101,536,203 | -6,655        | upstream | ABCC2     |
| 10                                   | 101,539,576 | 101,540,297 | -2,367        | upstream | ABCC2     |
| 10                                   | 101,543,344 | 101,545,578 | 2,561         | in gene  | ABCC2     |
| 10                                   | 101,594,080 | 101,594,553 | 51,777        | in gene  | ABCC2     |
| 10                                   | 4,998,865   | 4,999,628   | -6,158        | upstream | AKR1C1    |
| 10                                   | 5,051,234   | 5,052,009   | 8,719         | in gene  | AKR1C2    |
| 10                                   | 5,052,669   | 5,052,882   | 7,439         | in gene  | AKR1C2    |
| 10                                   | 5,061,156   | 5,061,353   | -1,105        | upstream | AKR1C2    |
| 10                                   | 5,061,822   | 5,063,377   | -2,337        | upstream | AKR1C2    |
| 10                                   | 5,135,177   | 5,135,517   | -1,272        | upstream | AKR1C3    |
| 10                                   | 5,137,996   | 5,138,593   | 1,560         | in gene  | AKR1C3    |
| 17                                   | 77,743,096  | 77,744,490  | -7,945        | upstream | CBX2      |
| 2                                    | 211,413,724 | 211,414,001 | 71,479        | in gene  | CPS1      |
| 6                                    | 53,409,665  | 53,409,992  | -25           | upstream | GCLC      |



|    |             |             |        |          |         |
|----|-------------|-------------|--------|----------|---------|
| 6  | 53,412,707  | 53,413,638  | -3,193 | upstream | GCLC    |
| 1  | 94,373,936  | 94,375,444  | 36     | in gene  | GCLM    |
| 2  | 143,625,855 | 143,626,160 | -9,211 | upstream | KYNU    |
| 2  | 143,628,268 | 143,628,521 | -6,811 | upstream | KYNU    |
| 2  | 143,630,925 | 143,632,304 | -4,091 | upstream | KYNU    |
| 4  | 178,229,311 | 178,229,741 | -1,487 | upstream | NEIL3   |
| 16 | 69,760,128  | 69,762,066  | -363   | upstream | NQO1    |
| 16 | 83,985,898  | 83,987,573  | 4,016  | in gene  | OSGIN1  |
| 1  | 10,471,540  | 10,471,741  | 12,579 | in gene  | PGD     |
| 1  | 10,474,785  | 10,475,941  | 16,547 | in gene  | PGD     |
| 1  | 10,476,216  | 10,476,438  | 17,187 | in gene  | PGD     |
| 1  | 10,476,527  | 10,476,830  | 17,603 | in gene  | PGD     |
| 4  | 139,143,256 | 139,143,579 | 20,095 | in gene  | SLC7A11 |
| 4  | 139,156,581 | 139,157,505 | 6,639  | in gene  | SLC7A11 |
| 4  | 139,163,119 | 139,163,744 | -17    | upstream | SLC7A11 |
| 17 | 18,625,091  | 18,625,407  | -186   | upstream | TRIM16L |
| 17 | 18,626,900  | 18,627,142  | 1,606  | in gene  | TRIM16L |
| 12 | 104,609,420 | 104,610,033 | 9      | in gene  | TXNRD1  |
| 12 | 104,612,631 | 104,614,373 | 3,785  | in gene  | TXNRD1  |
| 12 | 104,670,612 | 104,671,587 | 61,801 | in gene  | TXNRD1  |
| 12 | 104,679,576 | 104,683,538 | 71,145 | in gene  | TXNRD1  |
| 4  | 41,258,754  | 41,260,230  | 462    | in gene  | UCHL1   |
| 4  | 39,516,284  | 39,517,062  | 12,386 | in gene  | UGDH    |
| 4  | 39,517,292  | 39,517,928  | 11,762 | in gene  | UGDH    |
| 4  | 39,528,889  | 39,529,166  | 258    | in gene  | UGDH    |
| 4  | 39,529,245  | 39,529,710  | -254   | upstream | UGDH    |

**Table S5: Fold change values of KMSGC obtained from the RNA-Seq data of NRF2 knockdown lung cancer cell lines**

| <b>KMSGC expression in H2122 cells after NRF2 knockdown-<br/>Bar-Peled <i>et al</i>, 2017 (GSE89569)</b> |                                               |
|----------------------------------------------------------------------------------------------------------|-----------------------------------------------|
| <b>Gene</b>                                                                                              | <b>Fold change<br/>(NRF2 KD vs. Control )</b> |
| AKR1C1                                                                                                   | -3.31                                         |
| CBR3                                                                                                     | -3.17                                         |
| NEIL3                                                                                                    | -3.14                                         |
| GCLM                                                                                                     | -3.01                                         |
| TRIM16L                                                                                                  | -2.88                                         |
| UCHL1                                                                                                    | -2.75                                         |
| OSGIN1                                                                                                   | -2.69                                         |
| SRXN1                                                                                                    | -2.50                                         |
| CBR1                                                                                                     | -2.46                                         |
| CABYR                                                                                                    | -2.43                                         |
| CBX2                                                                                                     | -2.43                                         |
| UGDH                                                                                                     | -2.38                                         |
| TSPAN7                                                                                                   | -2.36                                         |
| PIR                                                                                                      | -2.35                                         |
| ABCB6                                                                                                    | -2.20                                         |
| TXNRD1                                                                                                   | -2.05                                         |
| PANX2                                                                                                    | -1.89                                         |
| ABCC2                                                                                                    | -1.86                                         |
| GPX2                                                                                                     | -1.69                                         |
| CES1                                                                                                     | -1.45                                         |

| <b>KMSGC expression in A549 cells after NRF2 knockdown-<br/>Olagnier <i>et al</i>, 2018 (GSE113519)</b> |                                               |
|---------------------------------------------------------------------------------------------------------|-----------------------------------------------|
| <b>Gene</b>                                                                                             | <b>Fold change<br/>(NRF2 KD vs. Control )</b> |
| TXNRD1                                                                                                  | -3.6                                          |
| TRIM16L                                                                                                 | -3.5                                          |
| SLC7A11                                                                                                 | -3.45                                         |
| OSGIN1                                                                                                  | -3.21                                         |
| GCLM                                                                                                    | -2.82                                         |
| G6PD                                                                                                    | -2.56                                         |
| AKR1C1                                                                                                  | -2.51                                         |
| PANX2                                                                                                   | -2.48                                         |
| SRXN1                                                                                                   | -2.38                                         |
| TRIM16                                                                                                  | -2.37                                         |
| UGDH                                                                                                    | -2.29                                         |
| AKR1C2                                                                                                  | -2.22                                         |
| GCLC                                                                                                    | -2.16                                         |
| NQO1                                                                                                    | -2.07                                         |
| TSPAN7                                                                                                  | -2.07                                         |
| ABCC2                                                                                                   | -2.01                                         |
| AKR1C3                                                                                                  | -1.84                                         |
| PGD                                                                                                     | -1.69                                         |
| NEIL3                                                                                                   | -1.68                                         |
| ABCB6                                                                                                   | -1.63                                         |

|          |       |
|----------|-------|
| GCLC     | -1.40 |
| G6PD     | -1.35 |
| AKR1C3   | -1.10 |
| NQO1     | -1.03 |
| CPS1     | -0.94 |
| SLC7A11  | -0.75 |
| TRIM16   | -0.62 |
| PGD      | -0.59 |
| AKR1C2   | -0.57 |
| SLC16A14 | -0.49 |
| SLC7A2   | -0.34 |
| KYNU     | -0.10 |
| S100P    | 0.45  |

|          |       |
|----------|-------|
| CES1     | -1.61 |
| CBR3     | -1.46 |
| KYNU     | -1.45 |
| CBR1     | -1.43 |
| UCHL1    | -1.38 |
| PIR      | -1.31 |
| GPX2     | -0.98 |
| CABYR    | -0.82 |
| CBX2     | -0.27 |
| S100P    | -0.12 |
| CPS1     | 0.12  |
| SLC7A2   | 0.37  |
| SLC16A14 | 0.5   |

**Table S6: List of primers used in this study for the qRT-PCR analysis**

| <b>mRNA</b> | <b>Function</b> | <b>Sequence</b>                 |
|-------------|-----------------|---------------------------------|
| CBX2        | Forward         | 5'-AGTGCATCCTGAGCAAGCG-3'       |
|             | Reverse         | 5'-TCCCAGCTGTTATGTTTGGAGG-3'    |
| G6PD        | Forward         | 5'-TGACCTGGCCAAGAAGAAGA-3'      |
|             | Reverse         | 5'-CAAAGAAGTCCTCCAGCTTG-3'      |
| AKR1C1      | Forward         | 5'-CGAGAAGAACCATGGGTGGA-3'      |
|             | Reverse         | 5'-GGCACAAAGGACTGGGTCC-3'       |
| NQO1        | Forward         | 5'-GGAGAGTTTGCTTACACTTACGC-3'   |
|             | Reverse         | 5'-AGTGGTGATGGAAAGCACTGCCTTC-3' |
| TRM16L      | Forward         | 5'-GTCCTTCTGTGTGCATTGGG-3'      |
|             | Reverse         | 5'-TCTGACACCGACACCAGAAC-3'      |
| NEIL3       | Forward         | 5'-CAAGCGTCCTAATTGTGGTCA-3'     |
|             | Reverse         | 5'-CCCTGCTAGATGTCCAACCTGATT-3'  |
| UCHL1       | Forward         | 5'-CCTGTGGCACAATCGGACTTA-3'     |
|             | Reverse         | 5'-CATCTACCCGACATTGGCCTT-3'     |
| TSPAN7      | Forward         | 5'-ACCAAACCTGTGATAACCTGTCT-3'   |
|             | Reverse         | 5'-AGGGAGATATAGGTGCCCAGA-3'     |
